# Supplementary material for: Receptor-Mediated Delivery of Astaxanthin-Loaded Nanoparticles to Neurons: An Enhanced Potential for Subarachnoid Hemorrhage Treatment
Source: Front Neurosci. 2019 Sep 18;13:989. doi: 10.3389/fnins.2019.00989 (PMC6759683; doi:10.3389/fnins.2019.00989)
Supplement: TABLE S1 — The original data of nanoparticle size. [file Table_1.XLSX]

## Sheet: Sheet1
X Number	Record 810: Fe-Trf
0.4	0
0.463	0
0.536	0
0.621	0
0.719	0
0.833	0
0.965	0
1.12	0
1.29	0
1.5	0
1.74	0
2.01	0
2.33	0
2.7	0
3.12	0
3.62	0
4.19	0
4.85	0
5.61	0
6.5	0
7.53	0
8.72	0
10.1	0
11.7	0
13.5	0
15.7	1.18
18.2	7.08
21	16.5
24.4	21.6
28.2	19.5
32.7	14.3
37.8	9.07
43.8	5.23
50.7	2.81
58.8	1.43
68.1	0.694
78.8	0.326
91.3	0.149
106	0.0671
122	0.03
142	0.0136
164	0.00637
190	0.00321
220	0.00181
255	0.00116
295	0.00078
342	0.000504
396	0.000311
459	0.000186
531	0.00011
615	6.3e-05
712	3.42e-05
825	1.73e-05
955	7.88e-06
1110	2.89e-06
1280	7.25e-07
1480	9.25e-08
1720	0
1990	0
2300	0
2670	0
3090	0
3580	0
4150	0
4800	0
5560	0
6440	0
7460	0
8630	0

## Sheet: Sheet2
X Number	Record 811: Fe-Trf-F647
0.4	0
0.463	0
0.536	0
0.621	0
0.719	0
0.833	0
0.965	0
1.12	0
1.29	0
1.5	0
1.74	0
2.01	0
2.33	0
2.7	0
3.12	0
3.62	0
4.19	0
4.85	0
5.61	0
6.5	0
7.53	0
8.72	0
10.1	0
11.7	0
13.5	0
15.7	0
18.2	3.99
21	14
24.4	21.6
28.2	21.1
32.7	16.1
37.8	10.5
43.8	6.16
50.7	3.35
58.8	1.72
68.1	0.844
78.8	0.4
91.3	0.184
106	0.0835
122	0.0376
142	0.0172
164	0.00813
190	0.00414
220	0.00237
255	0.00154
295	0.00105
342	0.000687
396	0.000432
459	0.000264
531	0.00016
615	9.45e-05
712	5.35e-05
825	2.87e-05
955	1.41e-05
1110	5.81e-06
1280	1.77e-06
1480	3.37e-07
1720	2.59e-08
1990	0
2300	0
2670	0
3090	0
3580	0
4150	0
4800	0
5560	0
6440	0
7460	0
8630	0

## Sheet: Sheet3
X Number	Record 814: Fe
0.4	0
0.463	0
0.536	0
0.621	0
0.719	0
0.833	0
0.965	0
1.12	0
1.29	0
1.5	0
1.74	0
2.01	0
2.33	0
2.7	0
3.12	0
3.62	0
4.19	0
4.85	0
5.61	0
6.5	0
7.53	0
8.72	0
10.1	0
11.7	0
13.5	2.82
15.7	12.7
18.2	23.6
21	25
24.4	17.9
28.2	10.1
32.7	4.74
37.8	1.95
43.8	0.731
50.7	0.262
58.8	0.0982
68.1	0.0427
78.8	0.0218
91.3	0.0122
106	0.00679
122	0.00369
142	0.00194
164	0.00101
190	0.000537
220	0.0003
255	0.000178
295	0.000102
342	5.05e-05
396	2.03e-05
459	5.85e-06
531	9.1e-07
615	0
712	0
825	0
955	0
1110	0
1280	0
1480	0
1720	0
1990	0
2300	0
2670	0
3090	0
3580	0
4150	0
4800	0
5560	0
6440	0
7460	0
8630	0
